# Supplementary material for: An engineered human Fc domain that behaves like a pH-toggle switch for ultra-long circulation persistence
Source: PubMed Central journal article supplement (PMC6834678; doi:10.1038/s41467-019-13108-2), 2019-11-06
Supplement: 41467_2019_13108_MOESM1_ESM.pdf [file 41467_2019_13108_MOESM1_ESM.pdf]

Supplementary information

## An Engineered Human Fc Domain that Behaves like a pH-Toggle Switch for Ultra-Long Circulation Persistence

C.-H. Lee et al.

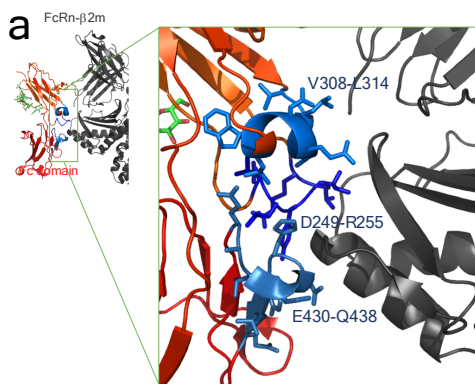

**b**

| Human  | codon | Possible residues                       |
|--------|-------|-----------------------------------------|
| Asp249 | VRK   | Asp/ Glu/Gly/His/Lys/Asn/Gln/Arg/Ser    |
| Thr250 | VMB   | Ala/Asp/Glu/His/Lys/Asn/Pro/Gln/Thr     |
| Leu251 | CDC   | His/Leu/Arg                             |
| Met252 | VWB   | Asp/Glu/His/Ile/Lys/Leu/Met/Asn/Gln/Val |
| Ile253 | VWH   | Asp/Glu/His/Ile/Lys/Leu/Asn/Gln/Val     |
| Ser254 | VRK   | Asp/ Glu/Gly/His/Lys/Asn/Gln/Arg/Ser    |
| Arg255 | VRK   | Asp/ Glu/Gly/His/Lys/Asn/Gln/Arg/Ser    |
| Val308 | SWB   | Asp/Glu/His/Leu/Gln/Val                 |
| Leu309 | VRK   | Asp/ Glu/Gly/His/Lys/Asn/Gln/Arg/Ser    |
| Gln311 | VRK   | Asp/ Glu/Gly/His/Lys/Asn/Gln/Arg/Ser    |
| Asp312 | VRK   | Asp/ Glu/Gly/His/Lys/Asn/Gln/Arg/Ser    |
| Leu314 | CDC   | His/Leu/Arg                             |
| Glu430 | VRK   | Asp/ Glu/Gly/His/Lys/Asn/Gln/Arg/Ser    |
| Leu432 | CDC   | His/Leu/Arg                             |
| Asn434 | VRK   | Asp/ Glu/Gly/His/Lys/Asn/Gln/Arg/Ser    |
| Tyr436 | BAC   | Asp/His/Tyr                             |
| Gln438 | VRK   | Asp/ Glu/Gly/His/Lys/Asn/Gln/Arg/Ser    |

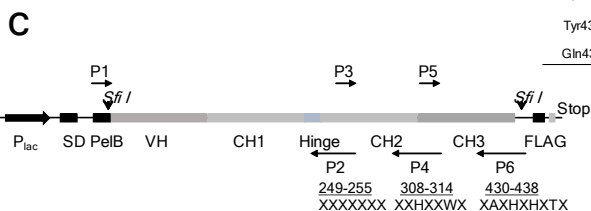

Step 1. Fragment PCR

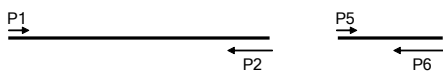

Step 2. Overlapping PCR

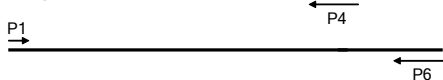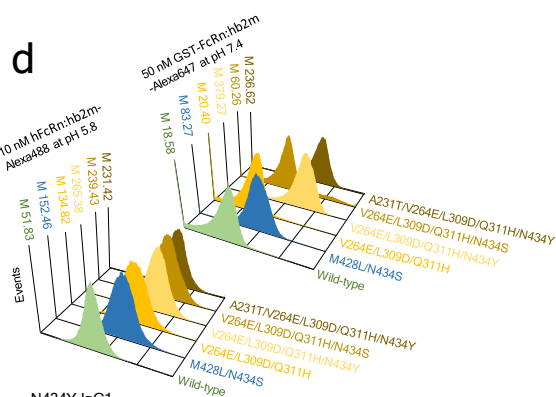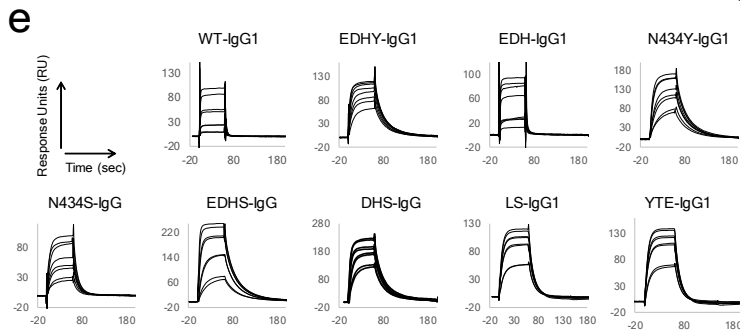

**f**

|            | $K_{on}$ ( $10^5 M^{-1} sec^{-1}$ ) | $K_{off}$ ( $10^{-2} sec^{-1}$ ) | $K_D$ (nM)    |
|------------|-------------------------------------|----------------------------------|---------------|
| WT-IgG1    | $5.4 \pm 0.30$                      | $29 \pm 0.85$                    | $550 \pm 46$  |
| EDHY-IgG1  | $4.65 \pm 0.38$                     | $23 \pm 0.01$                    | $487 \pm 35$  |
| EDHS-IgG1  | $14 \pm 2.0$                        | $3.8 \pm 0.11$                   | $28 \pm 4.7$  |
| N434Y-IgG1 | $7.4 \pm 2.5$                       | $3.1 \pm 0.11$                   | $43.6 \pm 13$ |
| EDHS-IgG1  | $12 \pm 1.3$                        | $11 \pm 1.0$                     | $93 \pm 1.3$  |
| N434S-IgG1 | $4.6 \pm 2.2$                       | $8.8 \pm 0.25$                   | $220 \pm 110$ |

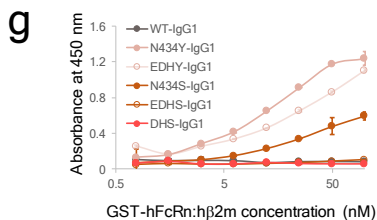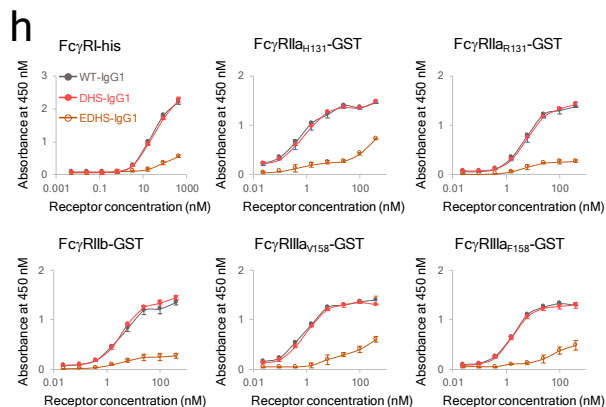

**Supplementary Fig. 1 Isolation of DHS-Fc and biochemical characterization.** (a) Binding sites of human IgG1-Fc domain for hFcRn. Residues in the Fc domain in contact with or neighboring hFcRn ( $< 7$  Å) are highlighted in blue (hFcRn-hFc complex structure, PDB ID: 4N0U)<sup>1</sup>: IgG1-Fc domain (Red), hFcRn:h $\beta$ 2m (Grey). (b) Degenerate codon scheme for the construction of the focused 17 position library to introduce His, wt, or charged amino acids. (c) Schematic illustration of the construction of the focused mutagenized libraries of Fc domains. (d) Fluorescent histogram of isolated IgG variants binding to 10 nM of hFcRn:h $\beta$ 2m-Alexa488 (left) or to 50 nM of GST-hFcRn:h $\beta$ 2m-Alexa647 (right). (e) SPR analysis of the interaction of antibody variants with hFcRn:h $\beta$ 2m at pH 5.8. (f) Kinetic values of IgG variants for hFcRn:h $\beta$ 2m at pH 5.8. Data are presented as mean  $\pm$  standard deviation from three independent experiments. (g) ELISA analysis of antibody variants binding to GST- hFcRn:h $\beta$ 2m at pH 7.4. Error bars: standard deviations from triplicate experiments. (h) ELISA analysis of DHS binding to his-tagged Fc $\gamma$ RI, GST-tagged Fc $\gamma$ RIIa<sub>H131</sub>, GST-tagged Fc $\gamma$ RIIa<sub>R131</sub>, GST-tagged Fc $\gamma$ RIIb, GST-tagged Fc $\gamma$ RIIIa<sub>V158</sub>, or GST-tagged Fc $\gamma$ RIIIa<sub>F158</sub>. Error bars: standard deviations from triplicate experiments.

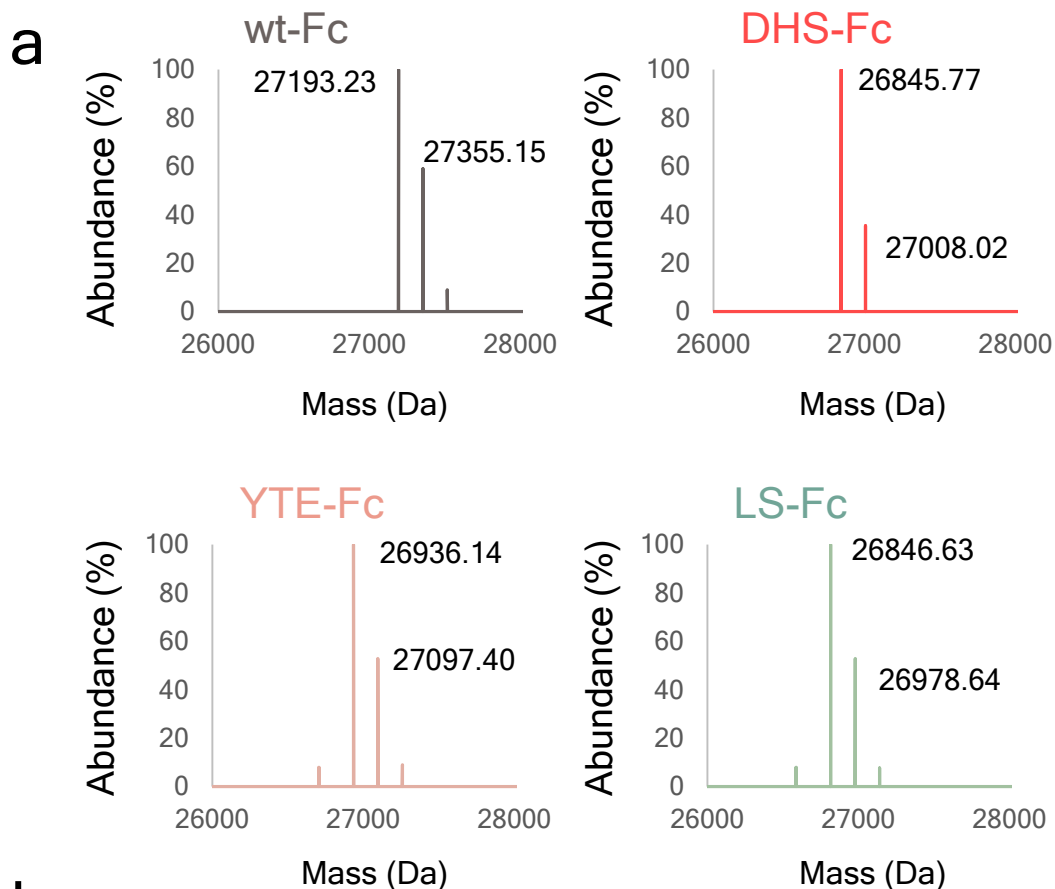

**b**

| Fc domain | N-Glycan | Mass of Fc | Mass of glycan |
|-----------|----------|------------|----------------|
| wt-Fc     | G0F      | 27193.23   | 1446.09        |
|           | G1F      | 27355.15   | 1608.01        |
| DHS-Fc    | G0F      | 26845.77   | 1445.97        |
|           | G1F      | 27008.02   | 1608.22        |
| YTE-Fc    | G0F      | 26936.14   | 1446.23        |
|           | G1F      | 27097.4    | 1607.49        |
| LS-Fc     | G1       | 26846.63   | 1475.82        |
|           | G1F      | 26978.64   | 1607.83        |

**Supplementary Figure 2. LC MS/MS spectra of Fc variants.** (a) Purified wt Fc, DHS-Fc, YTE-Fc, or LS-Fc was examined with 10 mM of dithiothreitol (DTT). Molecular weight (M.W.) estimated from the LS-MS data is shown and multiple predominant species detected are a consequence of glycan heterogeneity. (b) Species of N-glycan were identified by calculated mass of N-glycan using following equation: Mass of N-glycan=Detected mass of Fc domain – theoretical mass of Fc domain without N-glycan.



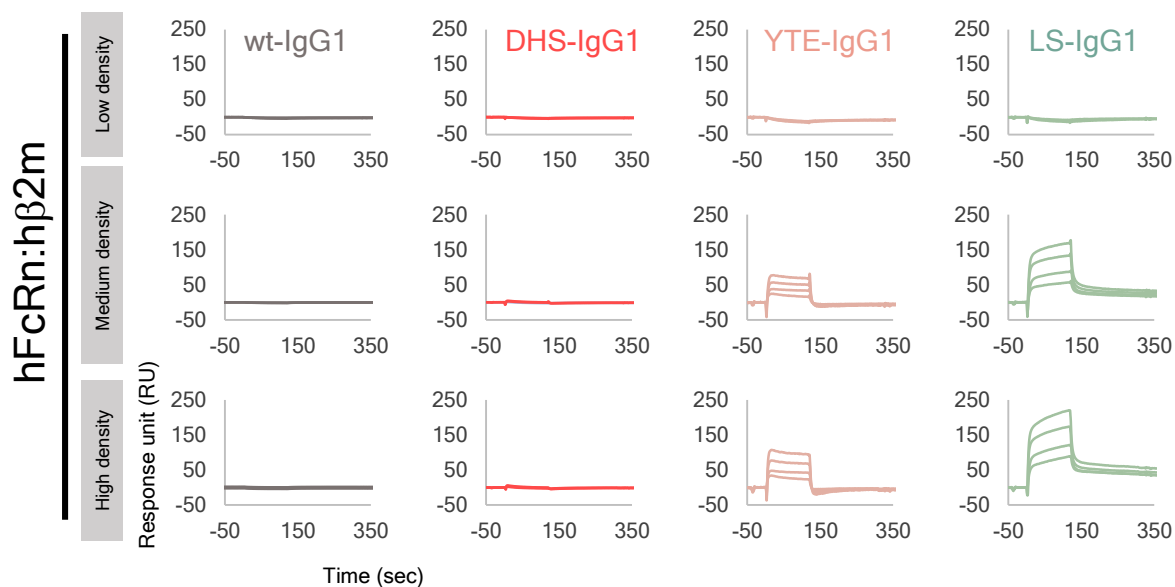

**Supplementary Figure 3. Kinetic binding analysis of DHS-IgG1.** SPR analysis of IgG variants (800-50 nM) with three different densities of hFcRn:h $\beta$ 2m at pH 7.4. hFcRn:h $\beta$ 2m was immobilized on the CM5 chips with three different levels, 500, 2000, and 4000 RU. In all sensorgrams, x-axis is time (sec) and y-axis is RU (response unit). All experiments were repeated three times independently and kinetic values are presented in **Fig. 1d**.

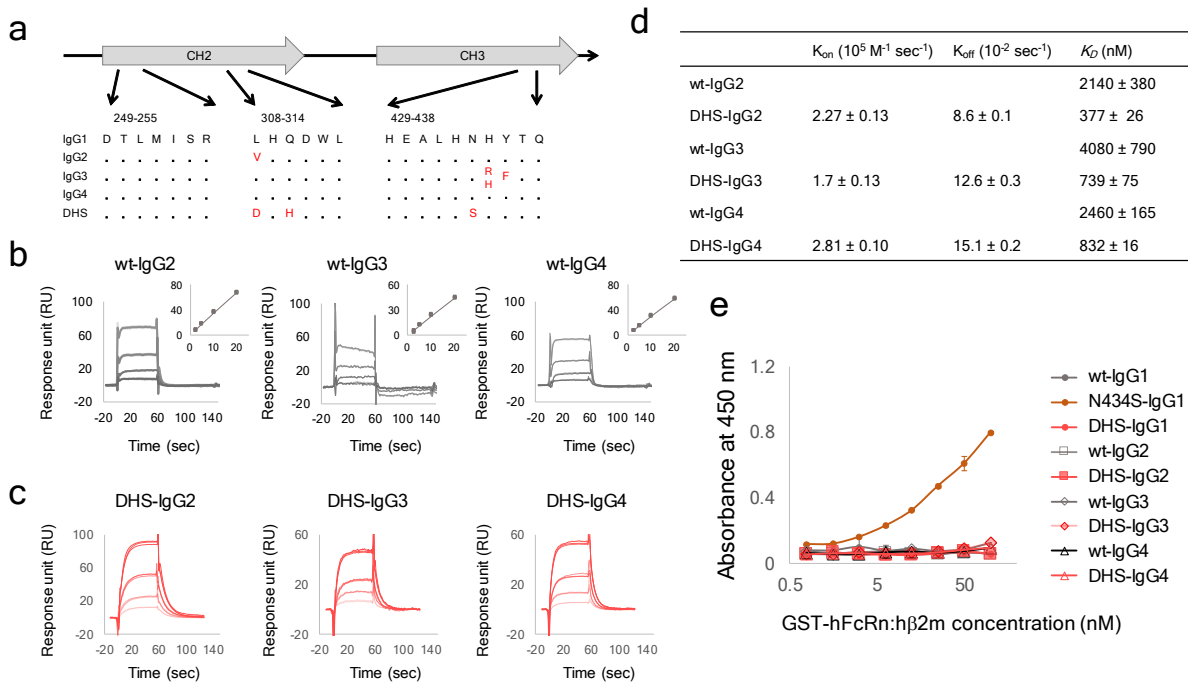

**Supplementary Figure 4. Binding properties of DHS mutants of human IgG2, IgG3 and IgG4 to hFcRn:hβ2m.** (a) Amino acids sequences of hFcRn-binding sites in DHS and wt human IgG1, IgG2, IgG3 and IgG4. (b-d) SPR analysis of the interaction of (b) wild type-IgG2, -IgG3 and -IgG4 and (c) DHS-IgG2, -IgG3 and -IgG4 with hFcRn:hβ2m at pH 5.8. All experiments were repeated three times independently and the kinetic values of each antibody are presented in (d). (e) ELISA analysis of DHS mutants of human IgG1, IgG2, IgG3 and IgG4 binding to GST-hFcRn:hβ2m at pH 7.4. Errors bars: standard deviations from triplicate experiments.

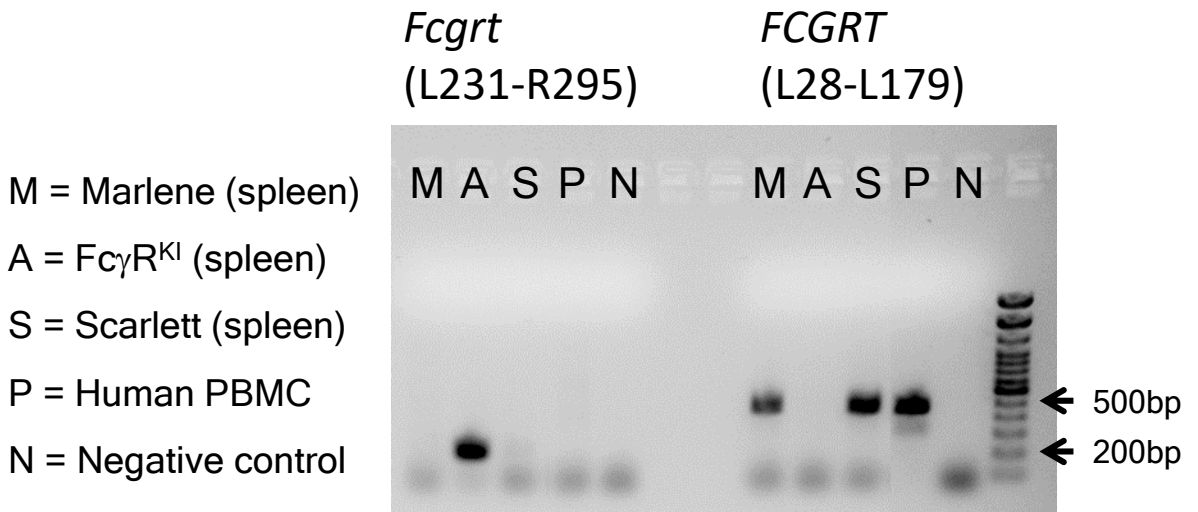

**Supplementary Figure 5. RT-PCR of the FcRn encoding genes *Fcgrt* (mouse) and *FCGRT* (human) in spleen of knock-in mice.** Image of an agarose gel showing the band corresponding to the 456 bp band of the *FCGRT* amplicon (L28-L179) and the 195 bp band of the *Fcgrt* amplicon (L231-R295), amplified from splenic mRNA of indicated mice or from the mRNA of human PBMCs.

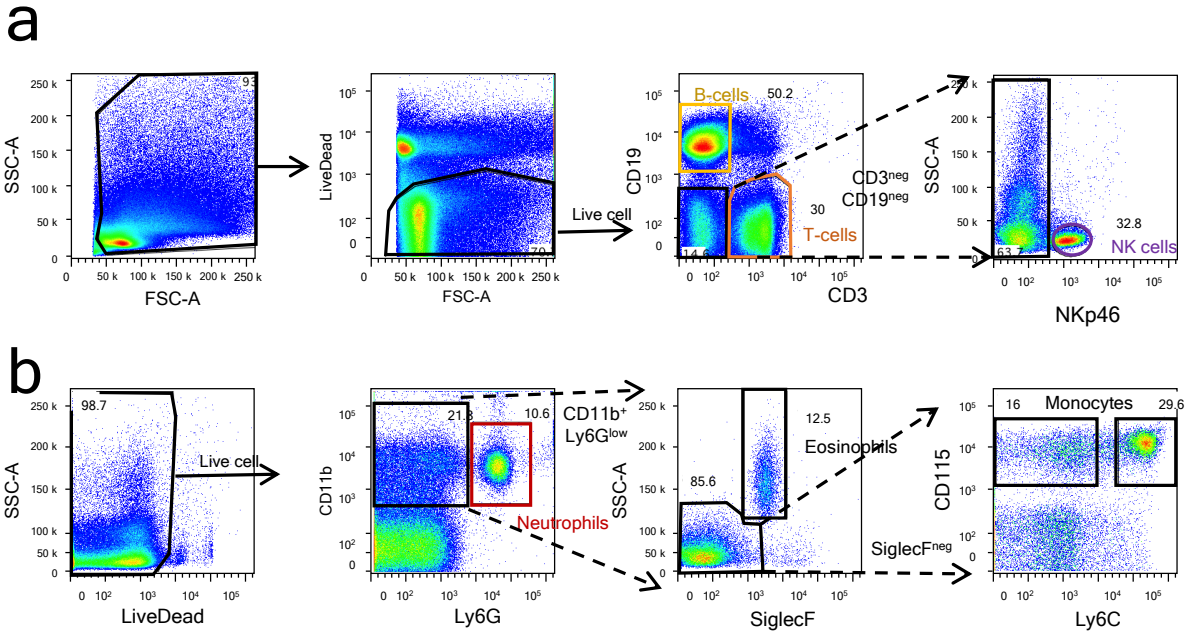

**Supplementary Figure 6. Gating strategy for each immune cell population from mouse spleen or blood. (a)** T cells ( $CD3^+$ ), B cells ( $CD19^+$ ) and NK Cells ( $CD3^{neg}$ ,  $CD19^{neg}$ ,  $NKp46^+$ ) in the spleen; **(b)** Neutrophils ( $CD11b^+Ly6G^{hi}$ ), Eosinophils ( $CD11b^+$ ,  $Ly6G^{low}$ ,  $SSC^{hi}$ ,  $SiglecF^+$ ), and Monocytes ( $CD11b^+$ ,  $Ly6G^{low}$ ,  $SiglecF^{neg}$ ,  $CD115^+$ , and  $Ly6C^{low}$  or  $-hi$ ) in the blood. Live cells were gated as DEAD-yellow negative.

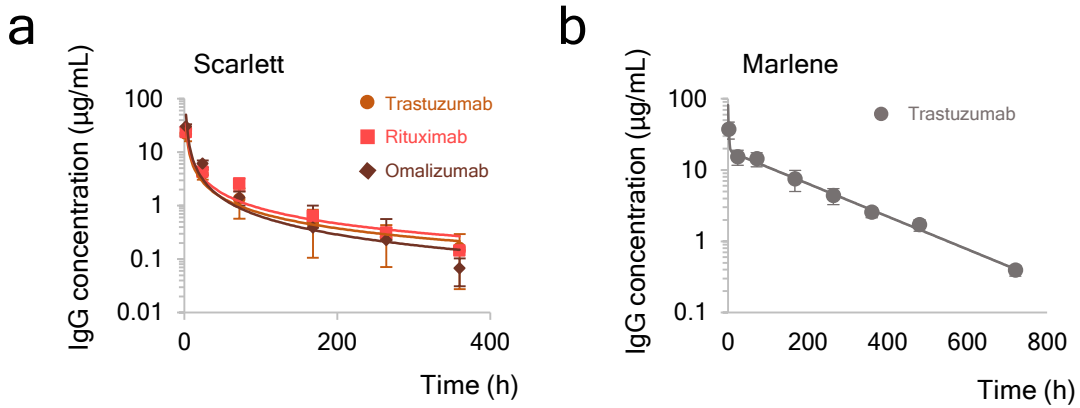

**C**

|          | Antibody    | $\beta$ phase $T_{1/2}$ (h) |
|----------|-------------|-----------------------------|
| Scarlett | Trastuzumab | 92.3 $\pm$ 18.1             |
|          | Rituximab   | 103.5 $\pm$ 7.5             |
|          | Omalizumab  | 101.1 $\pm$ 6.5             |
| Marlene  | Trastuzumab | 130.6 $\pm$ 4.9             |

**Supplementary Figure 7. Pharmacokinetics of wt TrastuzumabIgG1 antibodies in Scarlett and Marlene mice.** (a-b) Change in human antibody concentration in serum following tail vein administration of 2 mg/kg of antibody in Scarlett (hFcRn<sup>KI</sup> h $\beta$ 2m<sup>KI</sup> hFc $\gamma$ R<sup>KI</sup> hIgG1, $\kappa$ <sup>KI</sup>) mice (n=7) and "Marlene" (hFcRn<sup>KI</sup> h $\beta$ 2m<sup>KI</sup> hFc $\gamma$ R<sup>KI</sup>) mice (n=6). (c) Pharmacokinetic parameters  $\beta$ -phase serum half-life of antibodies is presented as mean  $\pm$  standard deviation.

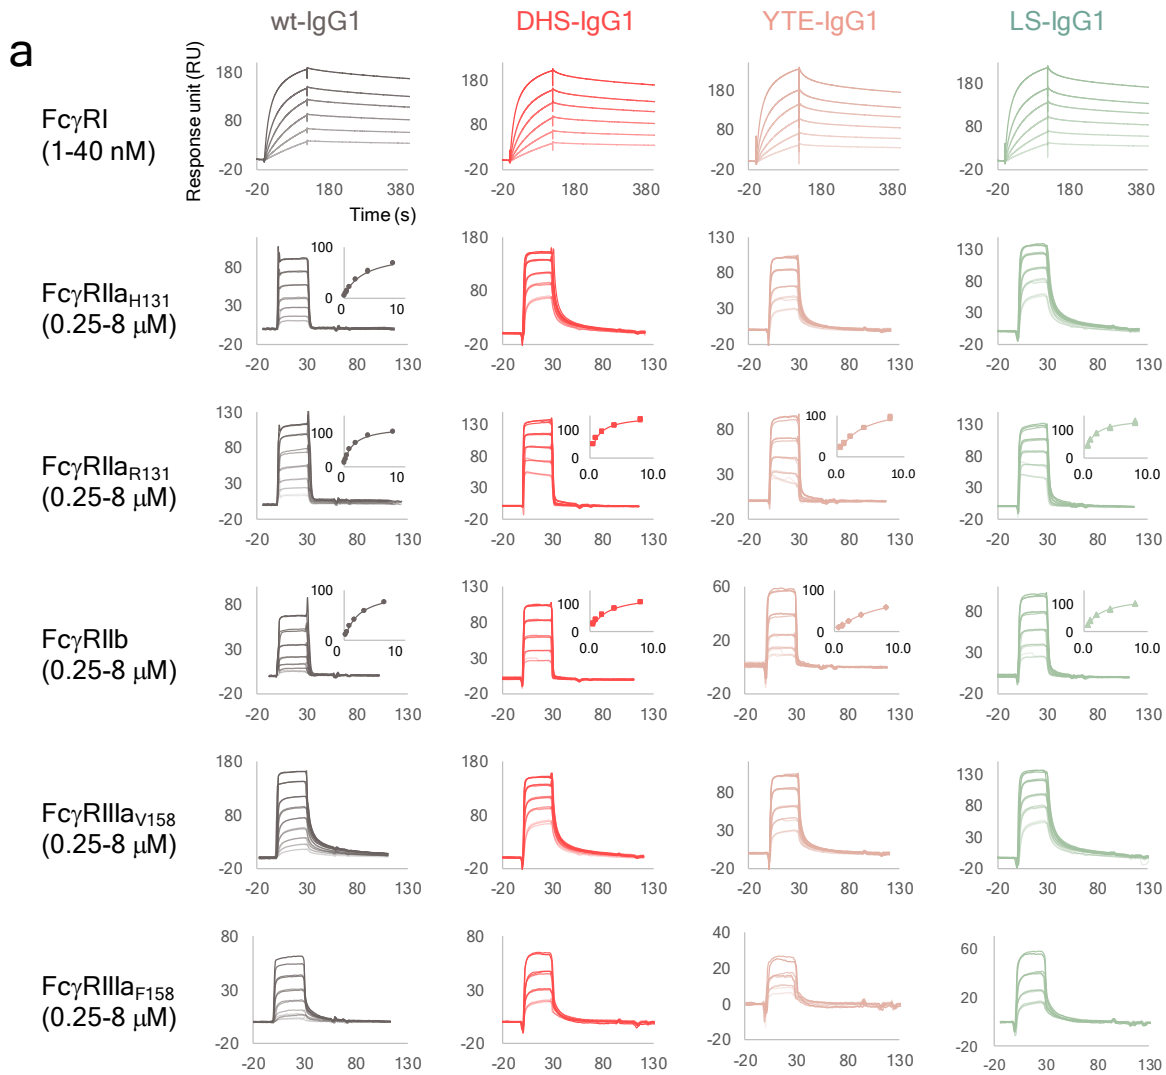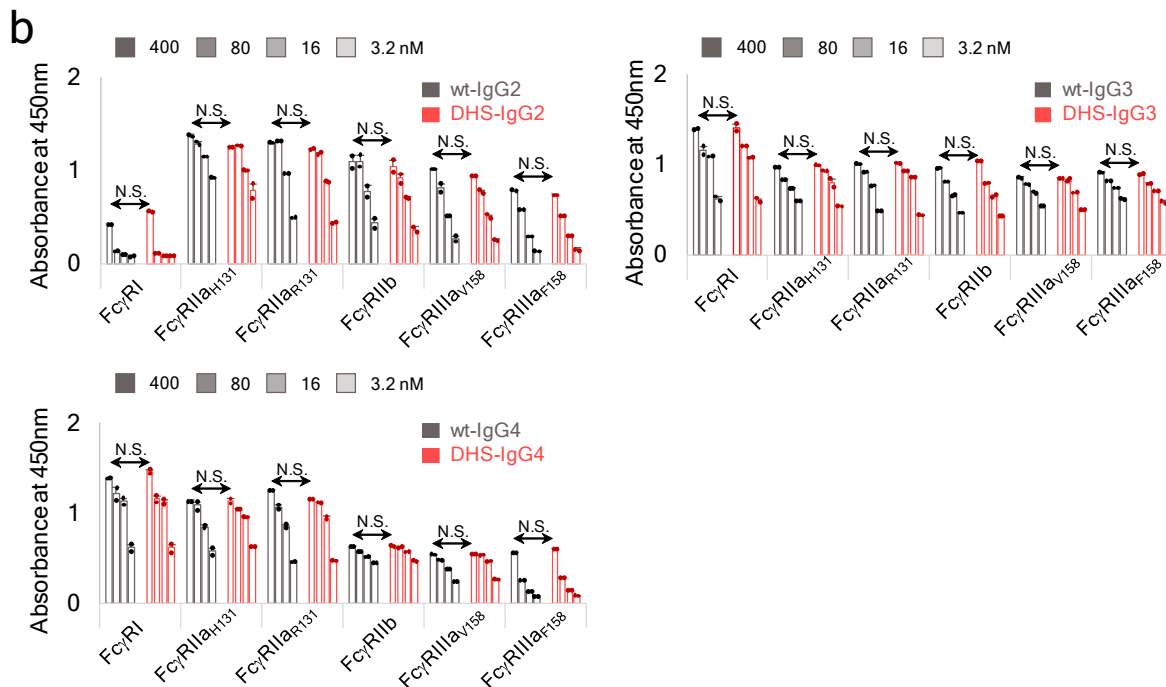

**Supplementary Figure 8. Binding analysis of DHS-IgG1, -IgG2, -IgG3 and -IgG4 to hFcγRs. (a)** SPR analysis of antibody binding to effector FcγRs or to purified C1q. Antibody variants were immobilized on CM5 chips. The binding of His-tagged high affinity FcγRI, or of low affinity FcγRIIa, FcγRIIb, or FcγRIIIa was assayed. In all sensorgrams, x-axis is time (sec) and y-axis is RU (response unit). All experiments were repeated three times independently and kinetic values are presented in **Fig. 3a**. **(b)** ELISA analysis of DHS-IgG2, DHS-IgG3, and DHS-IgG4 binding to hFcγRs. ELISA plates were coated with antibody variants and the 400-3.2 nM of his-tagged FcγRI, GST-tagged FcγRIIa<sub>H131</sub>, GST-tagged FcγRIIa<sub>R131</sub>, GST-tagged FcγRIIb, GST-tagged FcγRIIIa<sub>V158</sub>, or GST-tagged FcγRIIIa<sub>F158</sub> were added and the binding intensity was detected using anti-His IgG conjugated to HRP or anti-GST IgG-HRP, accordingly. P-values by two-way ANOVA test, N.S.  $P \geq 0.05$ . Errors bars: standard deviations from triplicate experiments.



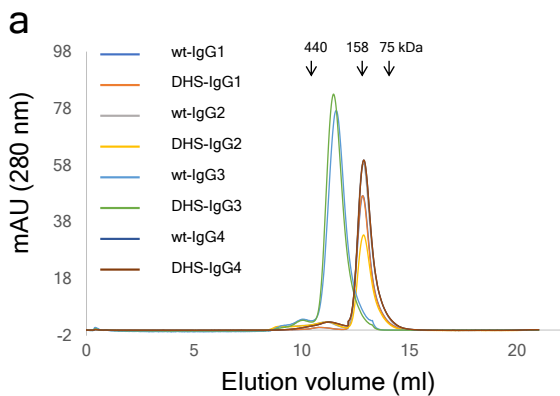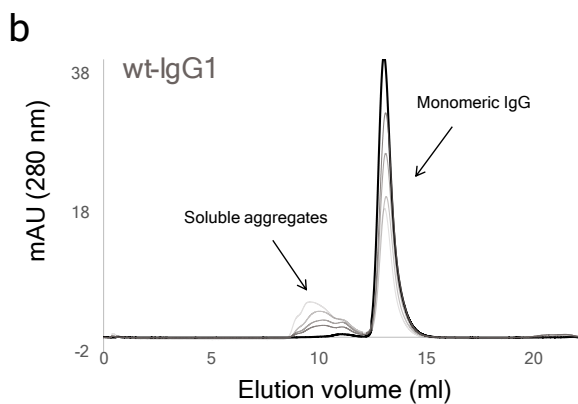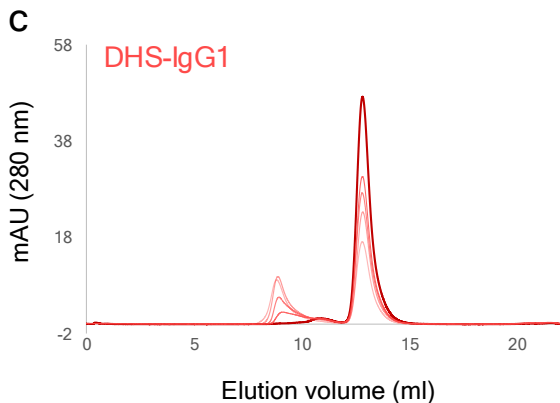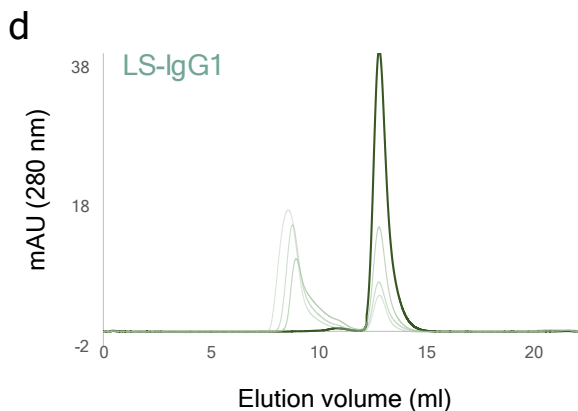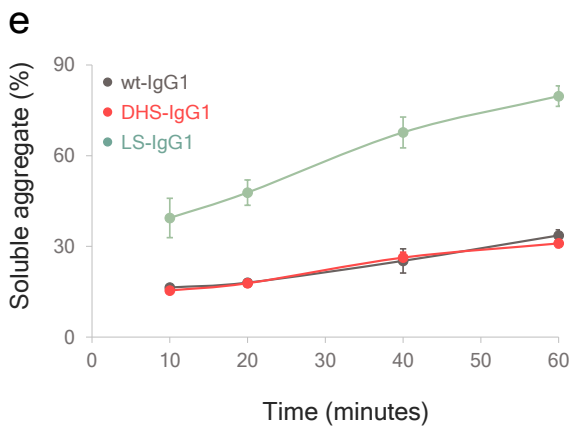

**Supplementary Figure. 9. Size exclusion chromatography (SEC) analysis of antibody variants. (a)** SEC of DHS-IgG subclasses. Each antibody variant (0.5 mg/ml) was injected into Superdex10/300 with 0.75 ml/min in pH 7.4 PBS. **(b-d)** Extent of antibody aggregation following thermal stress. Antibody variants (0.5 mg/ml) were incubated in pH 7.4 PBS at 70 °C for 0, 10, 20, 40, or 60 min (dark to bright color) and then was injected into Superdex10/300 with 0.75 ml/min in pH 7.4 PBS. Data are from one experiment representative of three experiments. Percentile of soluble aggregates of antibodies **(b-d)** was presented. Error bars: S.D. from four repeated experiments. *Note:* Trastuzumab-YTE is not shown as >90% visibly precipitated.

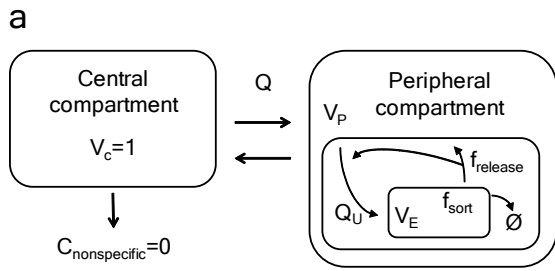

**b**

|          | $Q [V_c/h]$           | $Q_U [V_p/h]$       | $V_{in}$            | $V_p$               |
|----------|-----------------------|---------------------|---------------------|---------------------|
| Tg276    | 0.83<br>(0.10 - 5.97) | 0.03<br>(0.02-0.04) | 0.17<br>(0.04-0.45) | 0.19<br>(0.05-0.46) |
| Scarlett | 0.86<br>(0.11 - 6.51) | 0.03<br>(0.02-0.04) | 0.16<br>(0.04-0.42) | 0.19<br>(0.05-0.45) |

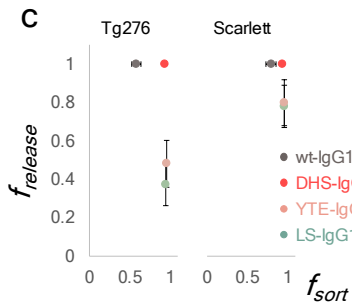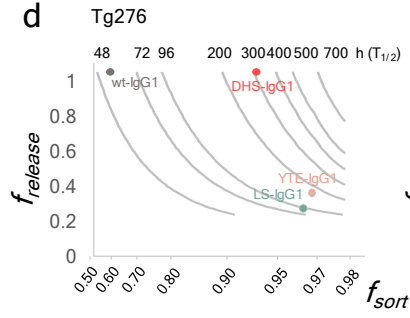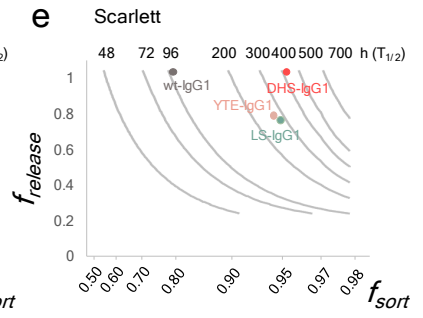

**Supplementary Figure 10. The relative PK properties of each IgG mutant can be explained through a model of endosomal sorting and release.** (a) Graphical representation of the IgG endosomal sorting model. (b) Fitted median values of each volumetric rate ( $Q$ , volumes of central compartment/h) and volume ( $V$ , relative to central compartment) in transport model with 95% confidence intervals. (c) Endosomal and surface sorting parameters for each mouse model. (d-e) Predicted half-life (top values) of IgG with the specified endosomal (x-axis) and surface (y-axis) sorting fractions based on the fit model; (d) for Tg276 and (e) for Scarlett. The real PK properties of each antibody variant are presented in each plot. Bars indicate 95% confidence intervals and median quantile values of each model parameter.

### Supplementary Table 1. Primer list

| Primer Name | Primer nucleotide sequence (5'→ 3')                                                                     |
|-------------|---------------------------------------------------------------------------------------------------------|
| P1          | GTTATTACTCGCGGCCAGCCG                                                                                   |
| P2          | CCA CGC ATG TGA CCT CAG GGG TMY BMY BDW BVW GGB GVK BMY BC<br>T TGG GTT TTG GGG GGA AGA GGA A           |
| P3          | ACC CCT GAG GTC ACA TGC GTG G                                                                           |
| P4          | GAC CTT GCA CTT GTA CTC CTT GCC ATT GHG CCA MYB MYB GTG MYB<br>VWS GGT GAG GAC GCT GAC CAC ACG          |
| P5          | AAT GGC AAG GAG TAC AAG TGC AAG GTC                                                                     |
| P6          | CGG GGA CAG GGA GAG GCT CTT MYB CGT GTV GTG MYB GTG GHG AG<br>C MYB ATG CAT CAC GGA GCA TGA GAA GAC GTT |
| PCH017      | GGCACGGTGGGCATGTGTGAGTTTTGTC                                                                            |
| PCH021      | CGGCCGCGAATTCGGCCCC                                                                                     |

### Supplementary Table 2. Pharmacokinetic values of antibody variants

|                 | AUC <sub>inf</sub> (µg*days/ml) | Clearance (ml/day/kg) | β phase T <sub>1/2</sub> (h) | Vss (ml/kg) |
|-----------------|---------------------------------|-----------------------|------------------------------|-------------|
| <b>WT-IgG2</b>  | 26.0 ± 2.0                      | 0.38 ± 0.06           | 76.2 ± 7.5                   | 0.97 ± 0.11 |
| <b>DHS-IgG2</b> | 76.3 ± 3.4                      | 0.13 ± 0.03           | 188.7 ± 4.9                  | 0.49 ± 0.02 |
| <b>WT-IgG3</b>  | 38.9 ± 5.5                      | 0.46 ± 0.02           | 72.6 ± 5.9                   | 1.16 ± 0.06 |
| <b>DHS-IgG3</b> | 125.9 ± 7.3                     | 0.16 ± 0.02           | 264.9 ± 42.5                 | 0.68 ± 0.05 |
| <b>WT-IgG4</b>  | 26.3 ± 3.0                      | 0.66 ± 0.03           | 70.5 ± 8.7                   | 1.73 ± 0.19 |
| <b>DHS-IgG4</b> | 57.5 ± 3.7                      | 0.28 ± 0.05           | 197.0 ± 18.8                 | 0.98 ± 0.03 |
